# Supplementary material for: Membrane negative curvature induced by a hybrid peptide from pediocin PA-1 and plantaricin 149 as revealed by atomistic molecular dynamics simulations
Source: Royal Society of Chemistry journal article supplement (doi:10.1039/c6sm01714b), 2016-01-01
Supplement: c6sm01714b1.pdf [file c6sm01714b1.pdf]

## Design, Characterization and Mechanism of Action of a Hybrid Peptide from Pediocin PA-1 and Plantaricin 149

G. C. A. da Hora,<sup>a</sup> N. L. Archilha,<sup>b</sup> J. L. S. Lopes,<sup>b</sup> D. M. Müller,<sup>c</sup> K. Coutinho,<sup>b</sup> R. Itri,<sup>b,\*</sup> and T. A. Soares<sup>a,\*</sup>

### Supplementary Information

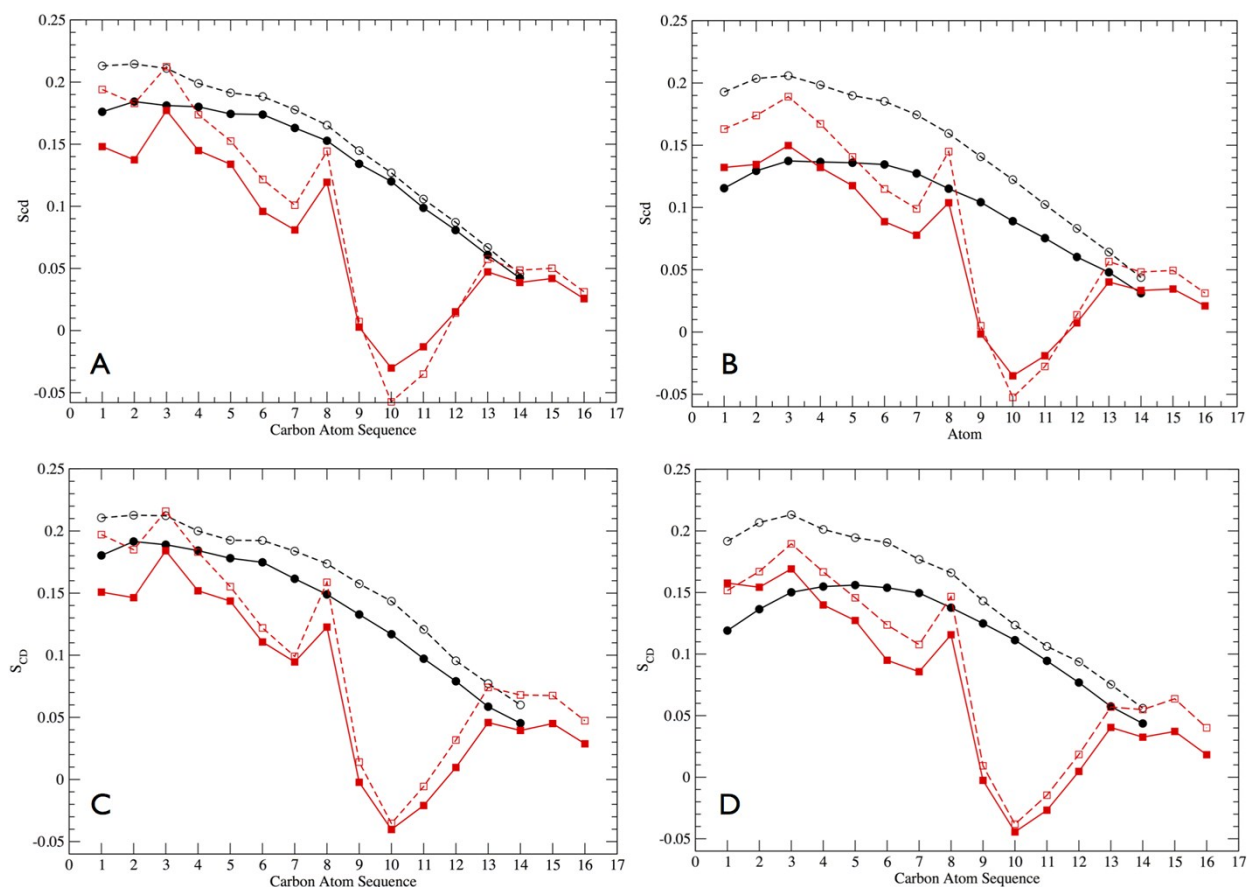

ESI-Fig. 1: Deuterium order parameters  $S_{CD}$  from simulated systems averaged over the first and last 10 ns of simulations. A. 100PCe1, B. 100PGe1, C. 100PCe2 and D. 100PGe2. Open circles or squares represent  $S_{CD}$  values averaged over the first 10 ns whereas closed circles or squares represent  $S_{CD}$  values averaged over the last 10 ns for acyl chains sn1 (black) and sn2 (red).

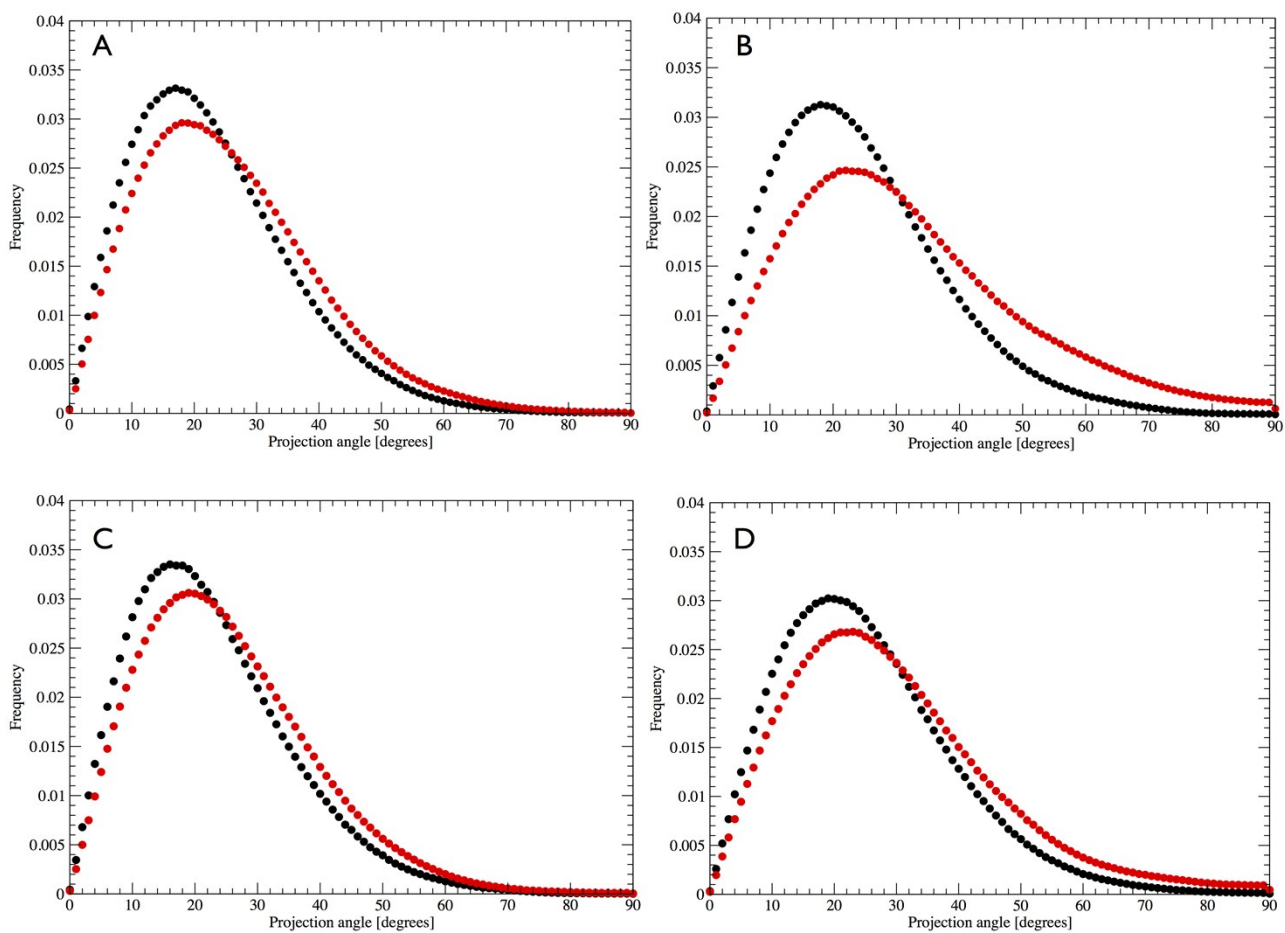

ESI-Fig. 2: Frequency distribution of lipid tilt angles with respect to the axis normal to the bilayer. A. 100PCe1, B. 100PGe1, C. 100PCe2 and D. 100PGe2. Insets depict the time-dependent behavior of tilt angles for the respective systems. Symbols are closed circles for tilt averaged of the first 10 ns (black) and over the last 10 ns (red).
